# Supplementary material for: The Beta-adrenergic agonist, Ractopamine, increases skeletal muscle expression of Asparagine Synthetase as part of an integrated stress response gene program
Source: PubMed Central journal article supplement (PMC6206132; doi:10.1038/s41598-018-34315-9), 2018-10-29
Supplement: 41598_2018_34315_MOESM1_ESM.pdf [file 41598_2018_34315_MOESM1_ESM.pdf]

1 **Supplementary Figures for “The Beta-adrenergic agonist, Ractopamine, increases skeletal muscle**  
 2 **expression of Asparagine Synthetase as part of an integrated stress response gene program”**

3

4 David M. Brown<sup>1,5</sup>, Kevin J.P. Ryan<sup>1,6</sup>, Zoe C.T.R. Daniel<sup>1</sup>, Molebeledi H.D. Mareko<sup>1,7</sup>, Richard Talbot<sup>4</sup>, Joanna  
 5 Moreton<sup>3</sup>, Tom C. Giles<sup>3</sup>, Richard D. Emes<sup>2,3</sup>, T. Charlie Hodgman<sup>1</sup>, Tim Parr<sup>1</sup>, John M. Brameld<sup>1\*</sup>

6

7 **Supplementary Table 1. Genes within the Calcium signalling pathway altered by Ractopamine treatment**

8

| Day    | Gene symbol (direction of regulation by Ractopamine) and gene name                                                                                                                                                                                                                                                                                       |
|--------|----------------------------------------------------------------------------------------------------------------------------------------------------------------------------------------------------------------------------------------------------------------------------------------------------------------------------------------------------------|
| Day 1  | MYH7 (DOWN) – Myosin Heavy Chain Slow Isoform                                                                                                                                                                                                                                                                                                            |
| Day 3  | ATF4 (UP) – Activating Transcription Factor 4/ cAMP-Response Element-Binding Protein 2<br>TPM1 (UP) - Tropomyosin 1                                                                                                                                                                                                                                      |
| Day 7  | TNNT1(DOWN) - Troponin T1, Slow Skeletal Type<br>TNNC1 (DOWN) - Troponin C1, Slow Skeletal And Cardiac Type<br>TNNT2 (UP) - Troponin T2, Cardiac Type<br>MYL4 (UP) - Myosin Light Chain 4, Embryonic Muscle/Atrial Isoform<br>MYH7 (DOWN) – MyHC type I<br>TNNI1 (DOWN) - Troponin I1, Slow Skeletal Type<br>ACTC1 (UP) - Actin, Alpha, Cardiac Muscle 1 |
| Day 13 | TRDN (DOWN) – Triadin or CPVT5<br>MYH7 (UP) - – MyHC type I<br>ACTC1 (UP) - Actin, Alpha, Cardiac Muscle 1<br>PNCK (UP) - CaM Kinase I Beta<br>ACTA1 (UP) - Actin, Alpha 1, Skeletal Muscle                                                                                                                                                              |
| Day 27 | TNNT1 (DOWN) - Troponin T1, Slow Skeletal Type<br>TNNC1 (DOWN) - Troponin C1, Slow Skeletal And Cardiac Type<br>TNNT2 (DOWN) - Troponin T2, Cardiac Type<br>TNNI1 (DOWN) - Troponin I1, Slow Skeletal Type<br>ACTC1 (UP) - Actin, Alpha, Cardiac Muscle 1                                                                                                |

9

10

11  
12

**Supplementary Table 2. Post hoc Bonferroni test comparisons for QPCR data (genes with significant time x treatment interactions)**

| Time (day) | Treatment | Asns            | Slc3a2            | Sars            | Arg2            | Ass1            | Sesn2           | Cdkn1a         |
|------------|-----------|-----------------|-------------------|-----------------|-----------------|-----------------|-----------------|----------------|
| 1          | Cont      | 0.0269 a        | 0.756 ab          | 0.4155 a        | 0.1204 ab       | 0.1176 a        | 0.3119 a        | 0.735 a        |
| 1          | GH        | 0.1300 a        | <b>1.885 df</b>   | 0.8308 ab       | 0.3641 ab       | 0.1314 a        | 0.7087 a        | 1.959 ab       |
| 1          | BA        | 0.1989 a        | 1.440 bcdef       | 0.5510 a        | 0.3033 ab       | 0.2364 ab       | 0.6125 a        | 2.830 b        |
| 3          | Cont      | 0.0499 a        | 0.961 abc         | 0.4277 a        | 0.2769 ab       | 0.1425 a        | 0.1968 a        | 1.214 ab       |
| 3          | GH        | 0.1281 a        | 1.556 bcdef       | 0.5038 a        | 0.2949 ab       | 0.1147 a        | 0.3909 a        | 1.613 ab       |
| 3          | BA        | <b>0.7353 b</b> | <b>3.017 g</b>    | <b>1.4949 b</b> | <b>1.0396 c</b> | <b>0.4868 c</b> | <b>2.8058 b</b> | <b>4.748 c</b> |
| 7          | Cont      | 0.0596 a        | 0.995 abcd        | 0.3651 a        | 0.1212 ab       | 0.1461 a        | 0.3343 a        | 1.075 ab       |
| 7          | GH        | 0.0328 a        | 0.701 ab          | 0.5671 a        | 0.1620 ab       | 0.1696 a        | 0.3021 a        | 0.757 a        |
| 7          | BA        | 0.2618 a        | <b>2.087 f</b>    | 0.6842 a        | 0.5136 b        | <b>0.5699 c</b> | 1.2558 a        | 2.831 b        |
| 13         | Cont      | 0.0338 a        | 0.777 ab          | 0.3477 a        | 0.1235 ab       | 0.1426 a        | 0.1040 a        | 0.884 a        |
| 13         | GH        | 0.0317 a        | 0.767 ab          | 0.6141 a        | 0.2220 ab       | 0.1807 a        | 0.2175 a        | 1.072 ab       |
| 13         | BA        | 0.2555 a        | <b>1.737 cdef</b> | 0.7345 a        | 0.4265 ab       | <b>0.5654 c</b> | 0.7203 a        | 2.129 ab       |
| 27         | Cont      | 0.0232 a        | 0.610 a           | 0.3533 a        | 0.1196 a        | 0.0968 a        | 0.1686 a        | 0.882 a        |
| 27         | GH        | 0.0367 a        | 0.740 ab          | 0.4569 a        | 0.1553 ab       | 0.1414 a        | 0.1389 a        | 0.925 a        |
| 27         | BA        | 0.1377 a        | 1.005 abcde       | 0.5989 a        | 0.2525 ab       | 0.3869 bc       | 0.3123 a        | 1.546 ab       |

13

14 Data shows the means only. Days 1, 3, 7 and 13 have n = 10, whilst day 27 has n = 15.

15 Means for each gene with different letters are significantly different (p<0.05, post hoc Bonferroni test).

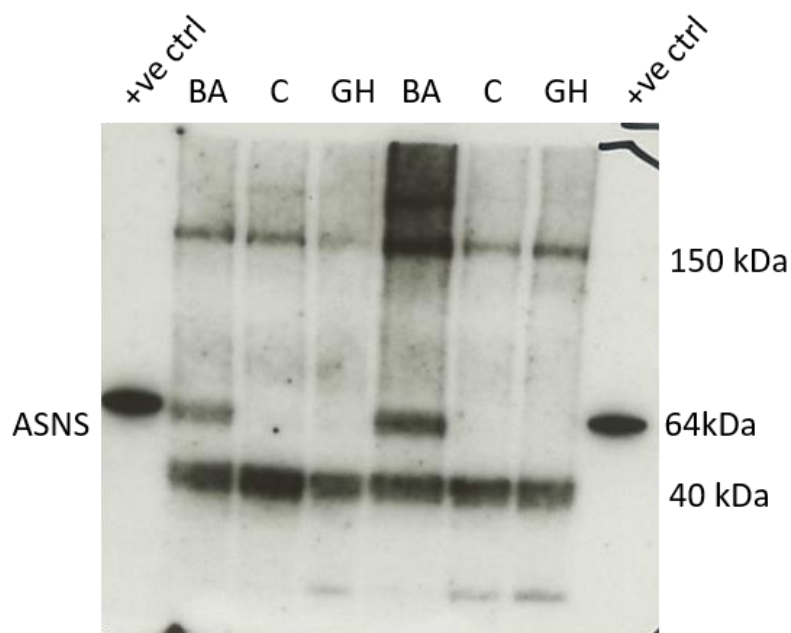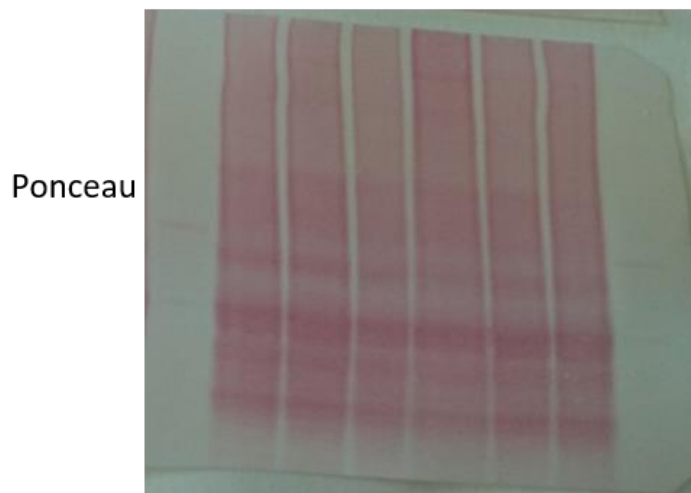

16  
17  
18  
19  
20

**Supplementary Figure 1. Representative images of the full blot and ponceau stained membrane for western blot determination of Asparagine Synthase (ASNS) protein in LD muscle samples from control (C), Beta-Agonist (BA) and Growth Hormone (GH) treated pigs at day 7. The +ve ctrl was untreated porcine myoblast cells.**

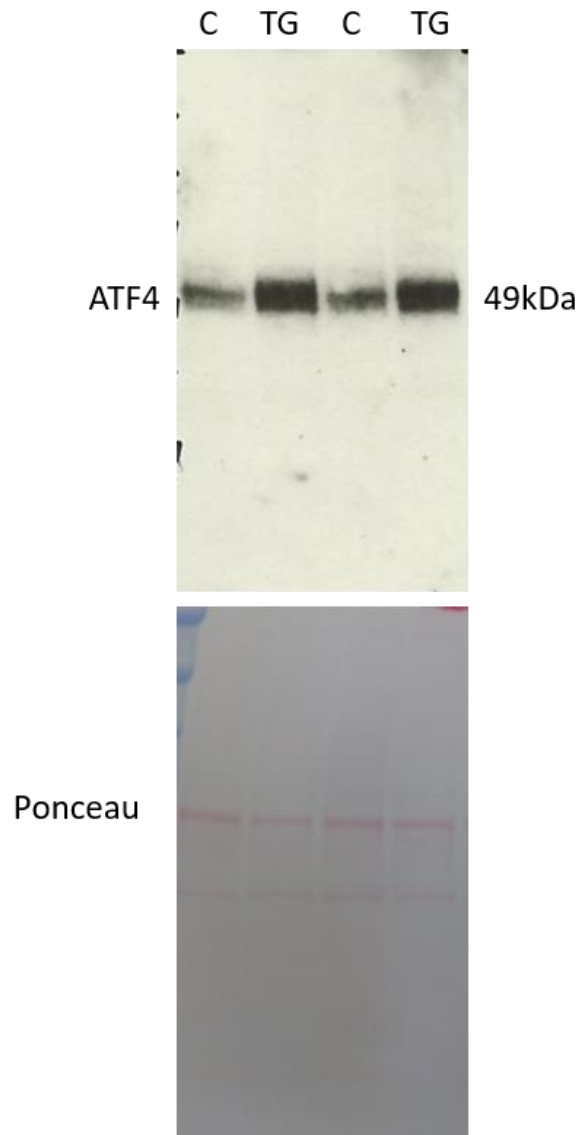

21  
22  
23  
24  
25  
26

**Supplementary Figure 2. Representative images of the full blot and ponceau stained membrane for western blot validation of the anti-ATF4 antibody to detect ATF4 in protein extracted from cultured porcine myoblast cells treated with or without 250nM thapsigargin for 8hrs (C= Control; TG= Thapsigargin treated). A single band was detected in all cells, which was increased in thapsigargin-treated cells.**

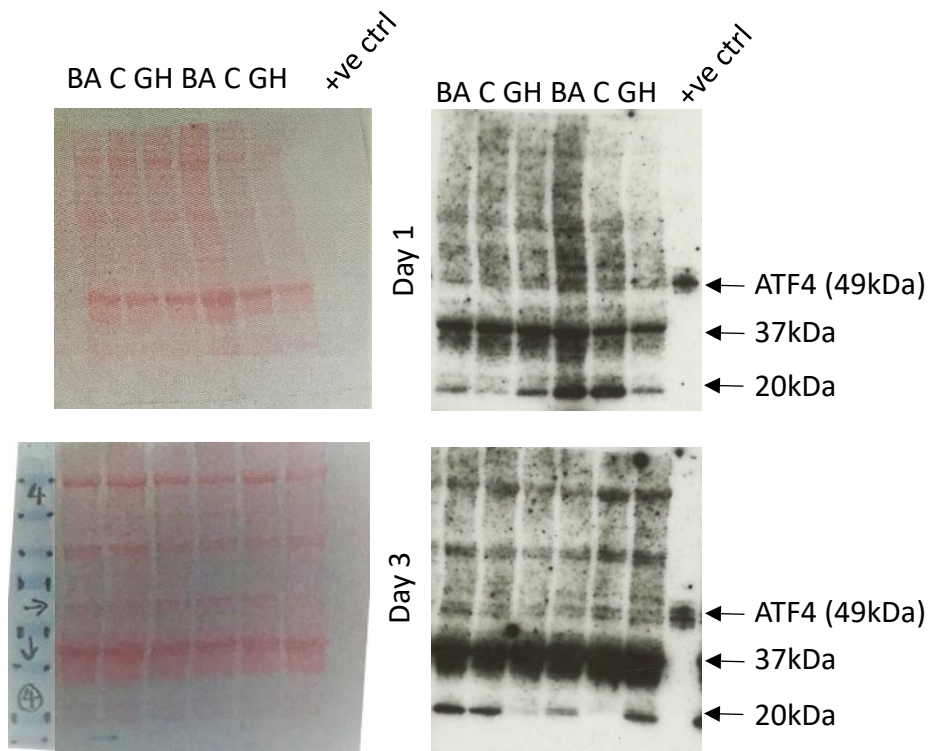

27  
28

29 **Supplementary Figure 3. Representative images of the ponceau stained membranes (left) and full blots (right) for western**  
 30 **blotting to detect ATF4 protein in LD muscle samples from Control (C), Beta-Agonist (BA) or Growth Hormone (GH)**  
 31 **treated pigs at days 1 and 3. The +ve ctrl was porcine myoblast cells treated with 250nM thapsigargin for 8hrs where a single**  
 32 **clear band is observed. No clear band for ATF4 was detected in any of the pig LD muscle samples.**

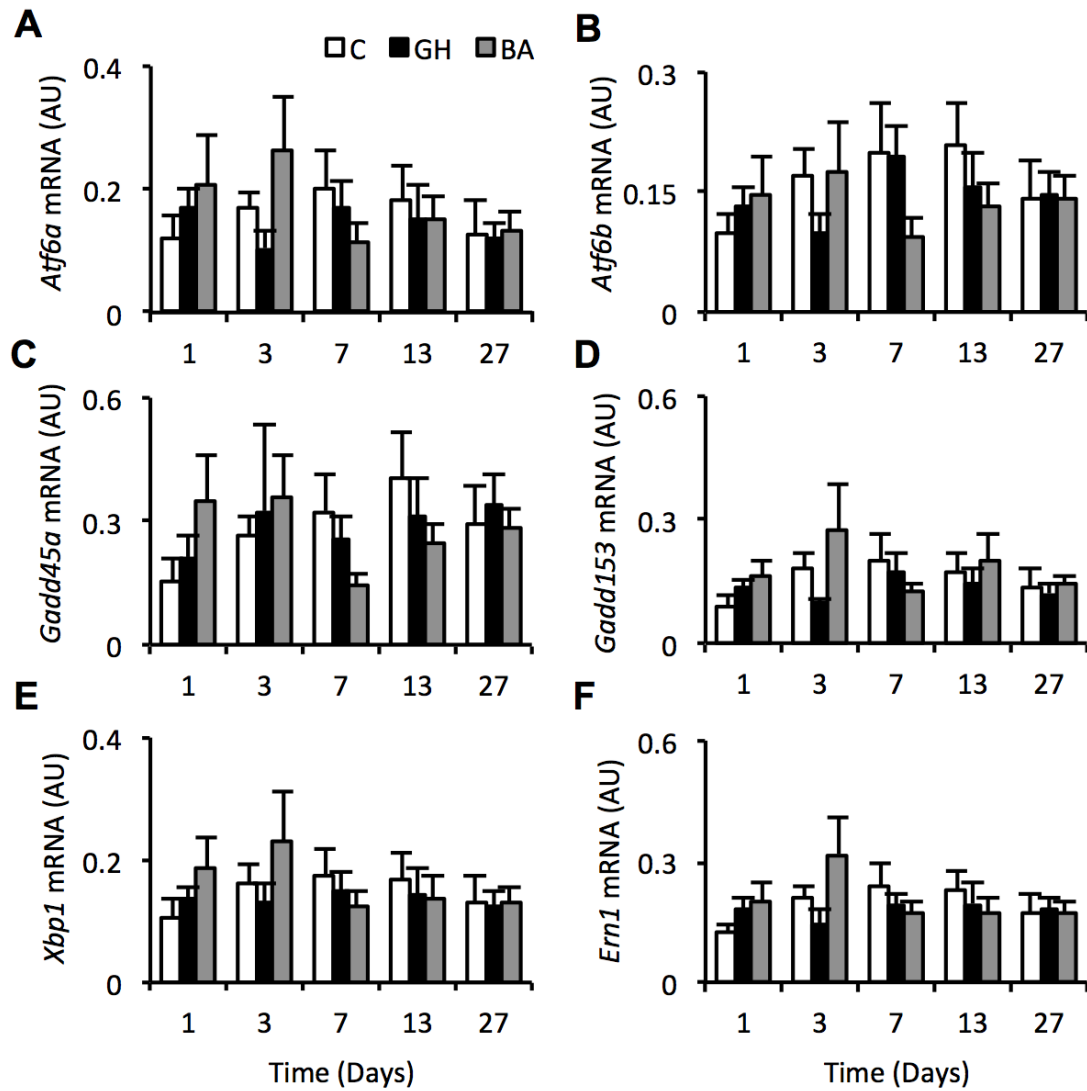

33

34 **Supplementary Figure 4. Gene expression of endoplasmic reticulum stress responsive genes**

35 Messenger RNA expression of the following genes were validated by qPCR on all 164 samples: (A) activating transcription  
 36 factor 6a (*Atf6a*), (B) activating transcription factor 6b (*Atf6b*), (C) Growth arrest and DNA damage inducible 45 alpha  
 37 (*Gadd45a*), (D) Growth arrest and DNA damage inducible 153 (*Gadd153*), (E) X-box binding protein 1 (*Xbp1*), (F) Endoplasmic  
 38 reticulum to nucleus signalling 1 (*Ern1*).

39 There were no statistically significant differences in expression levels. Data is mean  $\pm$  SEM. Days 1, 3, 7 and 13 have  $n = 10$   
 40 whilst day 27 has  $n = 15$ . White bars = control, black bars = GH (growth hormone), grey bars = BA (beta-adrenergic agonist).
